# Supplementary material for: X-ray fluorescence spectroscopy (XRF) for metallome analysis of herbarium specimens
Source: Springer Nature journal article supplement (doi:10.1186/s13007-022-00958-z), 2022-12-19
Supplement: MOESM1 [file 13007_2022_958_MOESM1_ESM.pdf]

## **Additional file 1**

# **X-ray fluorescence spectroscopy (XRF) for metallome analysis of herbarium specimens**

Imam Purwadi<sup>1</sup>, Lachlan W. Casey<sup>2</sup>, Chris G. Ryan<sup>3</sup>, Peter D. Erskine<sup>1</sup>, Antony van der Ent<sup>1,4\*</sup>

<sup>1</sup>Centre for Mined Land Rehabilitation, Sustainable Minerals Institute,  
The University of Queensland, Queensland, Australia.

<sup>2</sup>Centre for Microscopy and Microanalysis, The University of Queensland, Australia.

<sup>3</sup>CSIRO, Mineral Resources, Australia.

<sup>4</sup>Laboratoire Sols et Environnement, INRAE, Université de Lorraine, France.

\*Corresponding author: A. van der Ent ([a.vanderent@uq.edu.au](mailto:a.vanderent@uq.edu.au)). Centre for Mined Land  
Rehabilitation, Sustainable Minerals Institute, The University of Queensland, Brisbane QLD 4072,  
Australia.

## Procedure data acquisition shown in Figure 1

In illustrating the effect of thickness on the XRF readings, spiked samples are prepared as follows:

1. *Elaeocarpus eumundii* fresh leaves were collected from the vicinity of our laboratory. This species was chosen due to its abundance.
2. *Elaeocarpus eumundii* fresh leaves were oven-dried at 60°C for 3 days.
3. The dried leaves were pulverized and sieved using a 0.25µm fine mesh sieve to attain uniform particle size.
4. The pulverized leaves divided into several portions. Each of four portions were spiked with 1000 µg g<sup>-1</sup> of Mn, Co, Cu, or Zn in the form of MnO<sub>2</sub>, Co<sub>3</sub>O<sub>4</sub>, CuO, and ZnO, respectively. Each of two portions were spiked with 10000 µg g<sup>-1</sup> of S or Ca in the form of S and CaO, respectively.
5. The mixtures of the pulverized leaves and spiked agents were shaken using the end-over-end shaker for 24h.
6. From each mixture, three replicate weights of 0.12g, 0.2g, 1.5g, and 3.0g for each of the mixtures was prepared. These are carefully transferred into the pre-assembled XRF cups and shaking gently to ensure all parts of the cup was completely covered with sample. A 25mm filter paper was placed next to it before a pure cellulose powder is added as 'backing agent'.
7. To determine the effectiveness of each of the time measurements, each sample cup was measured with the instrument for 60s using Soils calibration modes. The results of XRF readings are provided in the Table S1.

**Table S1.** The results of XRF measurements on the spiked samples.

| No | Element | Replicate | Weight (g) | XRF Concentration ( $\mu\text{g g}^{-1}$ ) | No | Element | Replicate | Weight (g) | XRF Concentration ( $\mu\text{g g}^{-1}$ ) |
|----|---------|-----------|------------|--------------------------------------------|----|---------|-----------|------------|--------------------------------------------|
| 1  | S       | 1         | 0.12       | 2642                                       | 37 | Co      | 1         | 0.12       | 510.1                                      |
| 2  | S       | 2         | 0.12       | 2215                                       | 38 | Co      | 2         | 0.12       | 560.2                                      |
| 3  | S       | 3         | 0.12       | 2667                                       | 39 | Co      | 3         | 0.12       | 429.1                                      |
| 4  | S       | 1         | 0.2        | 2809                                       | 40 | Co      | 1         | 0.2        | 524.1                                      |
| 5  | S       | 2         | 0.2        | 2528                                       | 41 | Co      | 2         | 0.2        | 666.3                                      |
| 6  | S       | 3         | 0.2        | 2892                                       | 42 | Co      | 3         | 0.2        | 647.2                                      |
| 7  | S       | 1         | 1.5        | 2726                                       | 43 | Co      | 1         | 1.5        | 1295.9                                     |
| 8  | S       | 2         | 1.5        | 3038                                       | 44 | Co      | 2         | 1.5        | 1367.4                                     |
| 9  | S       | 3         | 1.5        | 2419                                       | 45 | Co      | 3         | 1.5        | 1358.5                                     |
| 10 | S       | 1         | 3          | 2679                                       | 46 | Co      | 1         | 3          | 1300.6                                     |
| 11 | S       | 2         | 3          | 2524                                       | 47 | Co      | 2         | 3          | 1326.8                                     |
| 12 | S       | 3         | 3          | 2768                                       | 48 | Co      | 3         | 3          | 1342.2                                     |
| 13 | Ca      | 1         | 0.12       | 33412                                      | 49 | Cu      | 1         | 0.12       | 343                                        |
| 14 | Ca      | 2         | 0.12       | 29004                                      | 50 | Cu      | 2         | 0.12       | 403                                        |
| 15 | Ca      | 3         | 0.12       | 32805                                      | 51 | Cu      | 3         | 0.12       | 482                                        |
| 16 | Ca      | 1         | 0.2        | 36259                                      | 52 | Cu      | 1         | 0.2        | 344                                        |
| 17 | Ca      | 2         | 0.2        | 35252                                      | 53 | Cu      | 2         | 0.2        | 649                                        |
| 18 | Ca      | 3         | 0.2        | 36280                                      | 54 | Cu      | 3         | 0.2        | 450                                        |
| 19 | Ca      | 1         | 1.5        | 35423                                      | 55 | Cu      | 1         | 1.5        | 1221                                       |
| 20 | Ca      | 2         | 1.5        | 35477                                      | 56 | Cu      | 2         | 1.5        | 1254                                       |
| 21 | Ca      | 3         | 1.5        | 35560                                      | 57 | Cu      | 3         | 1.5        | 1222                                       |
| 22 | Ca      | 1         | 3          | 34580                                      | 58 | Cu      | 1         | 3          | 1241                                       |
| 23 | Ca      | 2         | 3          | 35829                                      | 59 | Cu      | 2         | 3          | 1247                                       |
| 24 | Ca      | 3         | 3          | 34915                                      | 60 | Cu      | 3         | 3          | 1223                                       |
| 25 | Mn      | 1         | 0.12       | 414                                        | 61 | Zn      | 1         | 0.12       | 364                                        |
| 26 | Mn      | 2         | 0.12       | 462                                        | 62 | Zn      | 2         | 0.12       | 381                                        |
| 27 | Mn      | 3         | 0.12       | 391                                        | 63 | Zn      | 3         | 0.12       | 206                                        |
| 28 | Mn      | 1         | 0.2        | 323                                        | 64 | Zn      | 1         | 0.2        | 257                                        |
| 29 | Mn      | 2         | 0.2        | 558                                        | 65 | Zn      | 2         | 0.2        | 399                                        |
| 30 | Mn      | 3         | 0.2        | 514                                        | 66 | Zn      | 3         | 0.2        | 665                                        |
| 31 | Mn      | 1         | 1.5        | 688                                        | 67 | Zn      | 1         | 1.5        | 1282                                       |
| 32 | Mn      | 2         | 1.5        | 705                                        | 68 | Zn      | 2         | 1.5        | 1315                                       |
| 33 | Mn      | 3         | 1.5        | 628                                        | 69 | Zn      | 3         | 1.5        | 1288                                       |
| 34 | Mn      | 1         | 3          | 612                                        | 70 | Zn      | 1         | 3          | 1278                                       |
| 35 | Mn      | 2         | 3          | 574                                        | 71 | Zn      | 3         | 3          | 1333                                       |
| 36 | Mn      | 3         | 3          | 687                                        | 72 | Zn      | 3         | 3          | 1339                                       |

**Table S2.** Relative standard deviation based on data provided in Table S1.

| Element | Duration (second) | Concentration ( $\mu\text{g g}^{-1}$ ) | Standard deviation | Average | Relative Standard Deviation |
|---------|-------------------|----------------------------------------|--------------------|---------|-----------------------------|
| Ca      | 30.0              | 34657.5                                | 237.3              | 34825.3 | 0.7%                        |
| Ca      | 30.0              | 35096.9                                |                    |         |                             |
| Ca      | 30.0              | 34721.7                                |                    |         |                             |
| Ca      | 60.0              | 34579.8                                | 646.8              | 35107.9 | 1.8%                        |
| Ca      | 60.0              | 35829.3                                |                    |         |                             |
| Ca      | 60.0              | 34914.5                                |                    |         |                             |
| Ca      | 120.0             | 35864.6                                | 73.1               | 35813.0 | 0.2%                        |
| Ca      | 120.0             | 35761.3                                |                    |         |                             |
| Ca      | 120.0             |                                        |                    |         |                             |
| Co      | 30.0              | 1305.7                                 | 20.6               | 1315.4  | 1.6%                        |
| Co      | 30.0              | 1301.4                                 |                    |         |                             |
| Co      | 30.0              | 1339.1                                 |                    |         |                             |
| Co      | 60.0              | 1300.6                                 | 21.0               | 1323.2  | 1.6%                        |
| Co      | 60.0              | 1326.8                                 |                    |         |                             |
| Co      | 60.0              | 1342.2                                 |                    |         |                             |
| Co      | 120.0             | 1292.5                                 | 26.8               | 1313.9  | 2.0%                        |
| Co      | 120.0             | 1305.1                                 |                    |         |                             |
| Co      | 120.0             | 1344.0                                 |                    |         |                             |
| Cu      | 30.0              | 1239.2                                 | 10.3               | 1235.6  | 0.8%                        |
| Cu      | 30.0              | 1243.6                                 |                    |         |                             |
| Cu      | 30.0              | 1224.0                                 |                    |         |                             |
| Cu      | 60.0              | 1240.7                                 | 12.8               | 1237.0  | 1.0%                        |
| Cu      | 60.0              | 1247.4                                 |                    |         |                             |
| Cu      | 60.0              | 1222.7                                 |                    |         |                             |
| Cu      | 120.0             | 1237.9                                 | 9.2                | 1227.3  | 0.7%                        |
| Cu      | 120.0             | 1221.6                                 |                    |         |                             |
| Cu      | 120.0             | 1222.5                                 |                    |         |                             |
| Mn      | 30.0              | 619.8                                  | 24.1               | 604.9   | 4.0%                        |
| Mn      | 30.0              | 617.8                                  |                    |         |                             |
| Mn      | 30.0              | 577.0                                  |                    |         |                             |
| Mn      | 60.0              | 611.8                                  | 57.6               | 624.5   | 9.2%                        |
| Mn      | 60.0              | 574.3                                  |                    |         |                             |
| Mn      | 60.0              | 687.4                                  |                    |         |                             |
| Mn      | 120.0             | 698.0                                  | 54.2               | 652.5   | 8.3%                        |
| Mn      | 120.0             | 667.1                                  |                    |         |                             |
| Mn      | 120.0             | 592.5                                  |                    |         |                             |
| Zn      | 30.0              | 1299.0                                 | 15.4               | 1313.4  | 1.2%                        |
| Zn      | 30.0              | 1329.6                                 |                    |         |                             |
| Zn      | 30.0              | 1311.7                                 |                    |         |                             |
| Zn      | 60.0              | 1278.2                                 | 33.4               | 1316.7  | 2.5%                        |
| Zn      | 60.0              | 1333.4                                 |                    |         |                             |
| Zn      | 60.0              | 1338.5                                 |                    |         |                             |
| Zn      | 120.0             | 1281.3                                 | 29.7               | 1312.5  | 2.3%                        |
| Zn      | 120.0             | 1315.6                                 |                    |         |                             |
| Zn      | 120.0             | 1340.5                                 |                    |         |                             |

**Table S3.** The parameters of X-ray spectrum fit used during this study

|                                                                                                              |                                         |
|--------------------------------------------------------------------------------------------------------------|-----------------------------------------|
| Element<br>Ti, Sn, Au (For thin film)<br>Ar, K, Ca, Sc, Ti, Cr, Mn, Fe, Co, Ni, Cu, Zn, Br, Sr (for samples) |                                         |
| Energy Range                                                                                                 | 1-30                                    |
| Det                                                                                                          | See Table S3                            |
| Q                                                                                                            | 3                                       |
| Filter                                                                                                       | Air 15mm + 4 micrometre thick Ultralene |
| Yield                                                                                                        | See Table S4                            |
| Advanced tab<br>Background: SNIP                                                                             | 8                                       |

**Table S4.** The parameters related to the detector obtained after calibration based on the thin films

|                               |                      |
|-------------------------------|----------------------|
| Material                      | Si (Si(Li) or Si     |
| Model                         | X-ray detector model |
| Diameter                      | 5.6419               |
| Distance                      | 1                    |
| Thickness                     | 1.4                  |
| Area                          | 25                   |
| Solid Angle                   | 24620.2              |
| Resolution                    | 0.15                 |
| Tilt Angle                    | 10                   |
| Shape                         | Round, Circular      |
| Array                         | Single detector      |
| Scale factor of Cohen et al   | Off                  |
| Volume solid-angle correction | On                   |
| Absorber Layer Definitions    |                      |
| #absorbers                    | 2                    |
| # absorber 1                  |                      |
| Thick                         | 5 microns            |
| Density                       | 1.803                |
| Formula                       | Be                   |
| Special                       | Plain filter         |
| # absorber 2                  |                      |
| Thick                         | 100 microns          |
| Density                       | 4.52                 |
| Formula                       | Ti                   |
| Special                       | Pinhole filter       |
| Solid-angle ratio             | 1.2                  |

**Table S5.** The parameters using during the yield calculation of Ti pure thick and thin film.

| <b>Beam Particle</b>          |                                               |
|-------------------------------|-----------------------------------------------|
| Photons                       | Continuous                                    |
| Source                        | See Table S5                                  |
| <b>Energy Range</b>           |                                               |
| E min                         | 2                                             |
| E max                         | 48                                            |
| <b>Detector</b>               |                                               |
| Theta                         | 90                                            |
| Phi                           | 0                                             |
| <b>Target</b>                 |                                               |
| Alpha                         | -45                                           |
| Beta                          | 0                                             |
| <b>Target Layer Selection</b> |                                               |
| Layers                        | 1                                             |
| Unknown                       | 1                                             |
| # Define layer 1              |                                               |
| Areal density                 | See Figure 4                                  |
| Density                       | 0.9                                           |
| Formula                       | C <sub>6</sub> H <sub>10</sub> O <sub>5</sub> |

**Table S6.** Source setup in GeoPIXE.

| <b>Anode</b>             |              |
|--------------------------|--------------|
| Formula                  | Ag           |
| <b>Source Parameters</b> |              |
| Volts                    | 50           |
| Power                    | 0.24         |
| Angle in                 | 45           |
| Angle out                | 45           |
| Spot                     | 0.001        |
| Omega                    | 2000         |
| Inline optics            | None         |
| <b>Filter</b>            |              |
| #filters                 | 2            |
| #filter 1                |              |
| Thick                    | 101.6 micron |
| Density                  | 7.867        |
| Formula                  | Fe           |
| Special                  | Plain filter |
| #filter 2                |              |
| Thick                    | 50.8 micron  |
| Density                  | 10.47        |
| Formula                  | Ag           |
| Special                  | Plain filter |



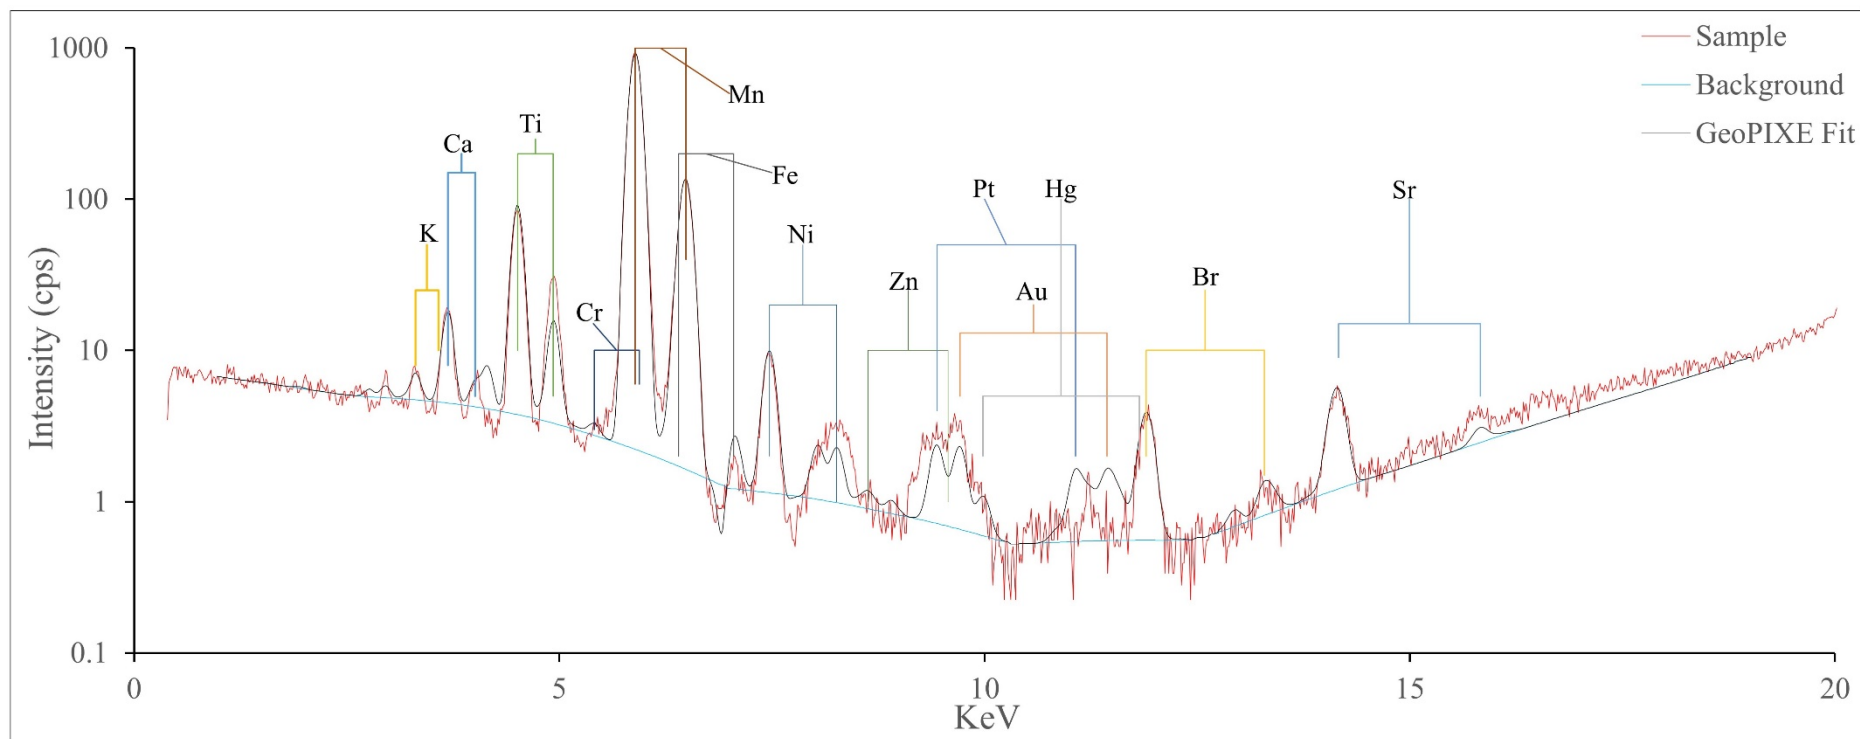

**Figure S1.** The result of fitting model in GeoPIXE into an XRF spectrum of Mn hyperaccumulator dry leaf.

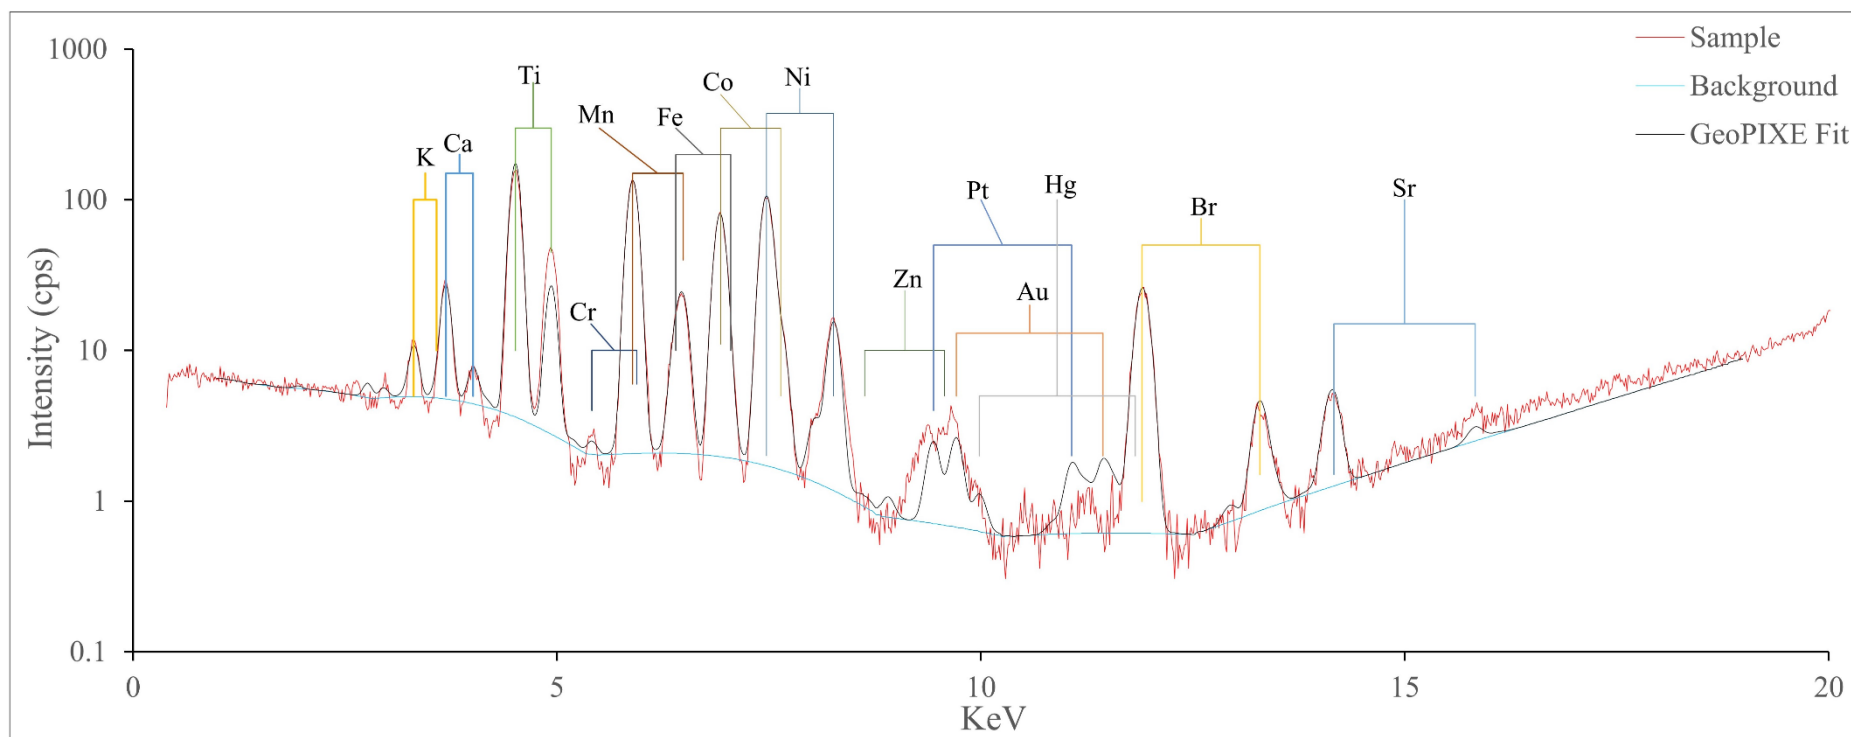

**Figure S2.** The result of fitting model in GeoPIXE into an XRF spectrum of Co hyperaccumulator dry leaf.

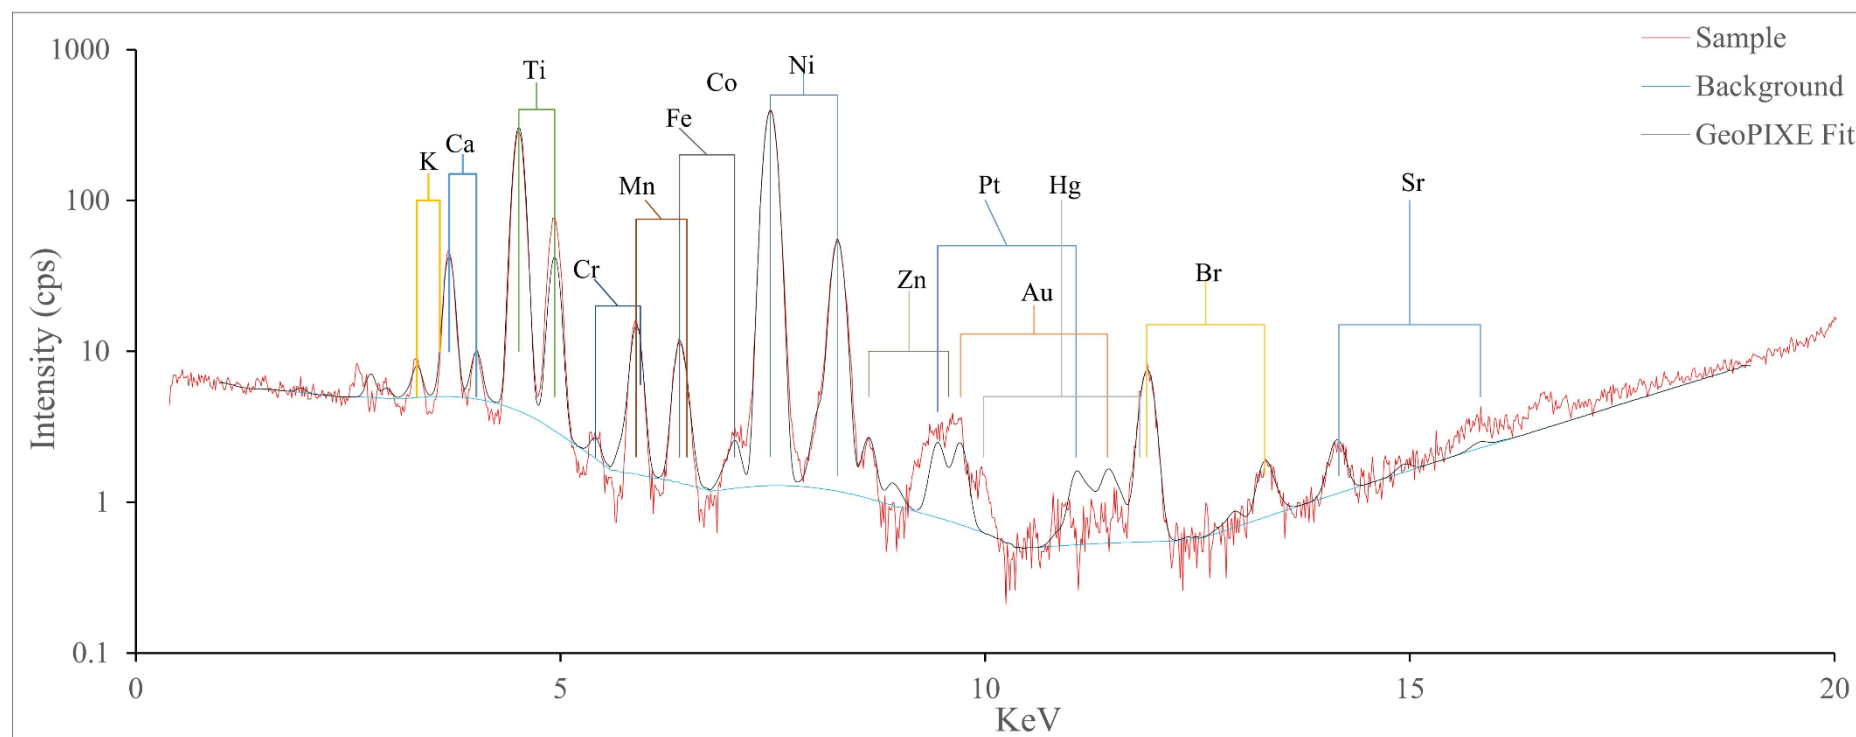

**Figure S3.** The result of fitting model in GeoPIXE into an XRF spectrum of Ni hyperaccumulator dry leaf.

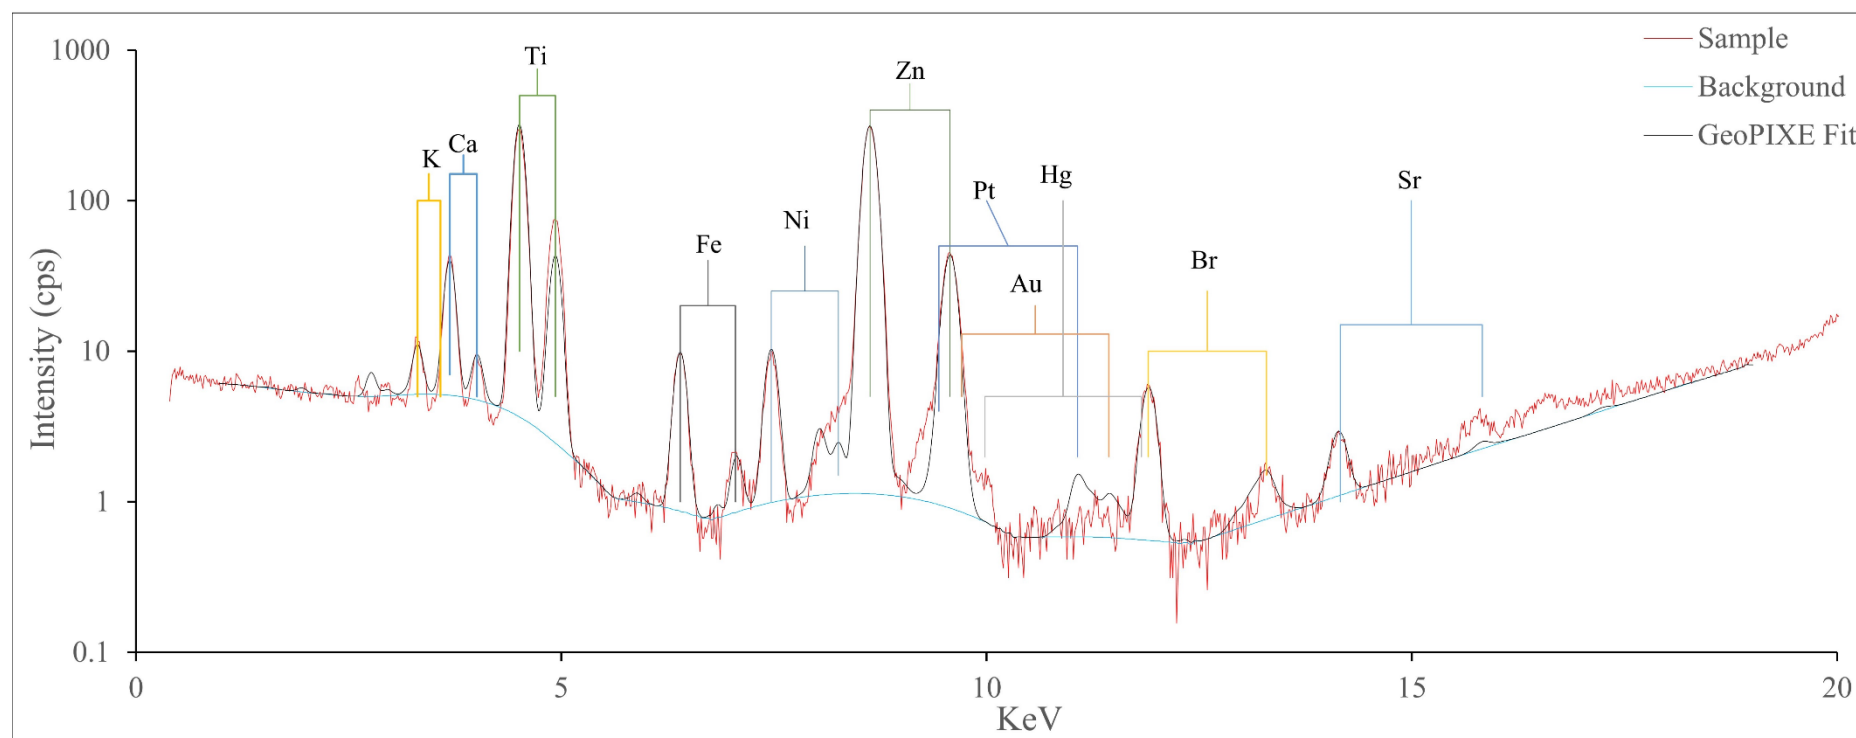

**Figure S4.** The result of fitting model in GeoPIXE into an XRF spectrum of Zn hyperaccumulator dry leaf.
